# Supplementary material for: D-Allulose Reduces Hypertrophy and Endoplasmic Reticulum Stress Induced by Palmitic Acid in Murine 3T3-L1 Adipocytes
Source: MDPI journal article supplement (doi:10.3390/ijms25074059), 2024-04-05
Supplement: s1 [file s1]

## D-Allulose Reduces Hypertrophy and Endoplasmic Reticulum Stress Induced by Palmitic Acid in Murine 3T3-L1 Adipocytes

Maria Sofia Molonia <sup>1,2</sup>, Federica Lina Salamone <sup>1</sup>, Antonio Speciale <sup>1,\*</sup>, Antonella Saija <sup>1,†</sup> and Francesco Cimino <sup>1,†</sup>

**Original images for blots of figure 2A and S2A: CEBP/β and β actin.** In the black boxes the parts of the images used in figure 2A. In the red boxes the parts of the images used in figure S2A.

**C/EBP-β**

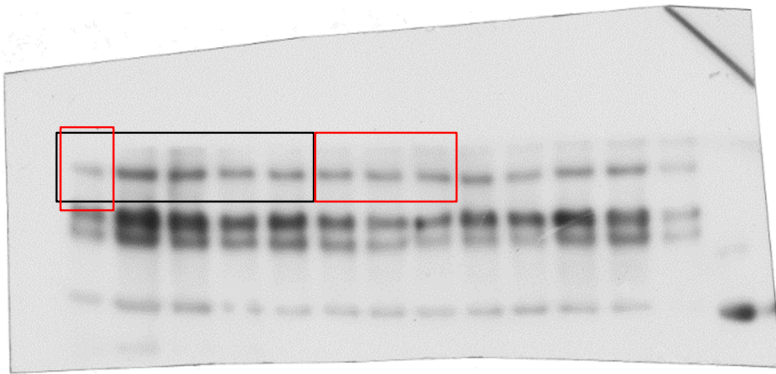

**β-actin**

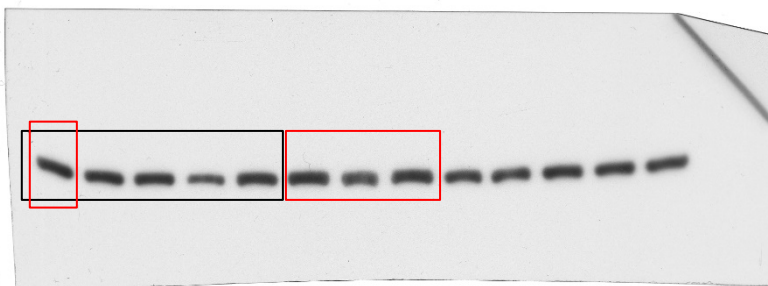

**Sample loading order:** 1° CTR – 2° PA 1 mM – 3° D-Allulose 1 mM + PA – 4° D-Allulose 10 mM + PA – 5° D-Allulose 20 mM + PA – 6° D-Allulose 1 mM – 7° D-Allulose 10 mM – 8° D-Allulose 20 mM – other samples

**Original images for blots of figure 2B and S2B: PPAR $\gamma$  and  $\beta$  actin.** In the black boxes the parts of the images used in figure 2B. In the red boxes the parts of the images used in figure S2B.

**PPAR $\gamma$**

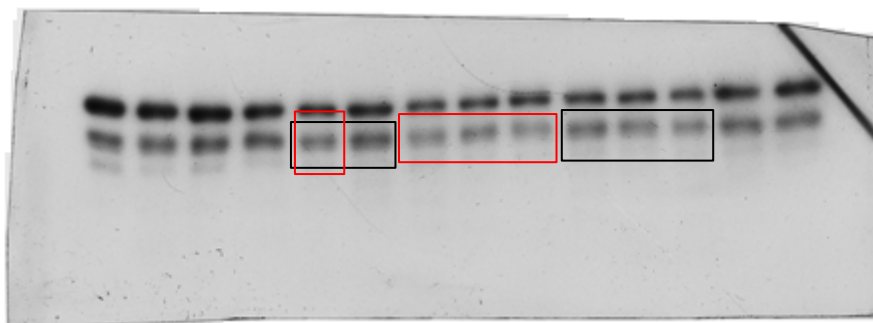

**$\beta$ -actin**

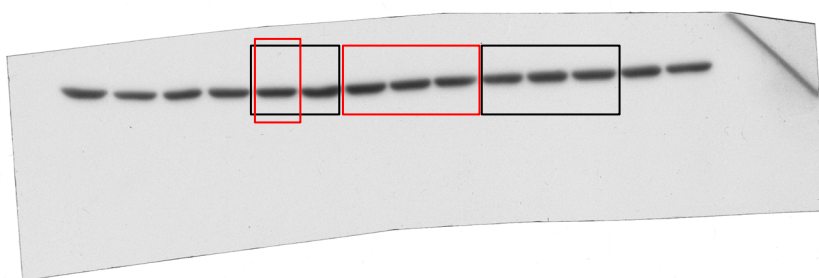

**Sample loading order:** other samples - 5° CTR – 6° PA 1 mM – 7° D-Allulose 1 mM – 8° D-Allulose 10 mM – 9° D-Allulose 20 mM – 10° D-Allulose 1 mM + PA – 11° D-Allulose 10 mM + PA – 12 ° D-Allulose 20 mM + PA - other samples

**Original images for blots of figure 3A and S3A: NF- $\kappa$ B and Lamin B.** In the black boxes the parts of the images used in figure 3A. In the red boxes the parts of the images used in figure S3A.

**NF- $\kappa$ B**

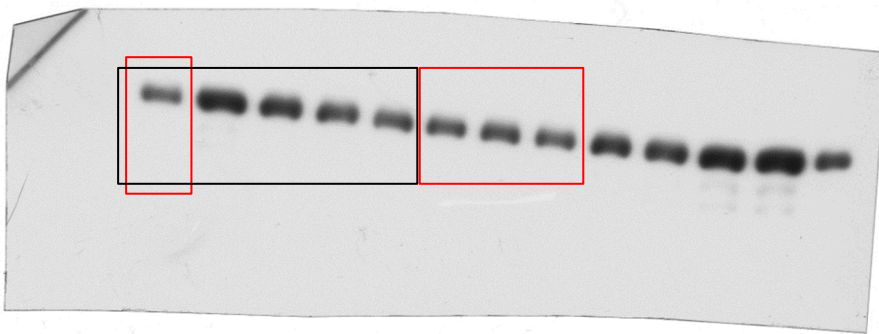

**Lamin B**

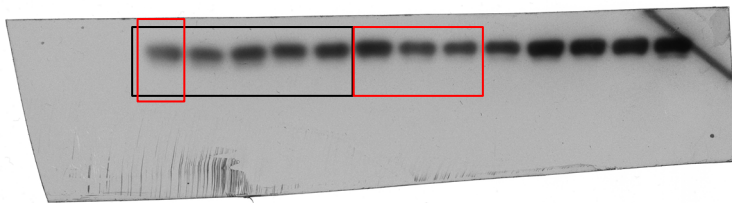

**Sample loading order:** 1° CTR – 2° PA 1 mM – 3° D-Allulose 1 mM + PA – 4° D-Allulose 10 mM + PA – 5° D-Allulose 20 mM + PA – 6° D-Allulose 1 mM – 7° D-Allulose 10 mM – 8° D-Allulose 20 mM - other samples

**Original images for blots of figure 3B and S3B: pIKK  $\alpha/\beta$  and  $\beta$  actin.** In the black boxes the parts of the images used in figure 3B. In the red boxes the parts of the images used in figure S3B.

**pIKK  $\alpha/\beta$**

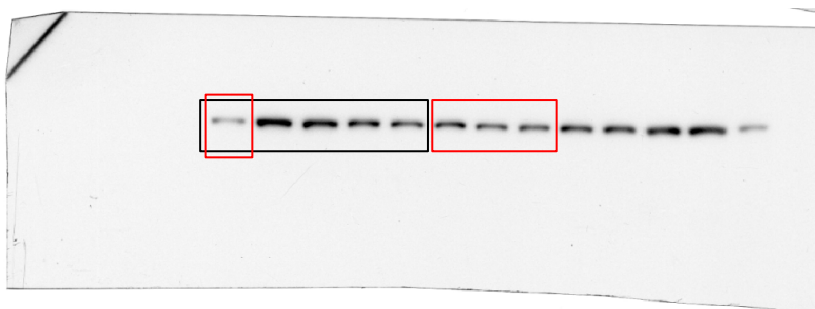

**$\beta$  actin**

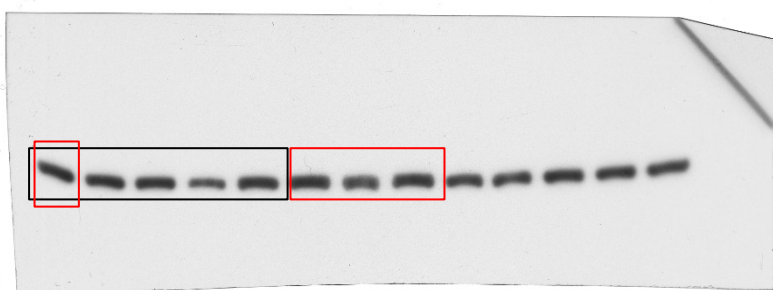

**Sample loading order: 1° CTR – 2° PA 1 mM– 3° D-Allulose 1 mM + PA – 4° D-Allulose 10 mM + PA – 5° D-Allulose 20 mM + PA – 6° D-Allulose 1 mM – 7° D-Allulose 10 mM- 8° D-Allulose 20 mM - other samples**

**Original images for blots of figure 5A and S5A: XBP-1s and  $\beta$  actin.** In the black boxes the parts of the images used in figure 5A. In the red boxes the parts of the images used in figure S5A.

#### **XBP-1s**

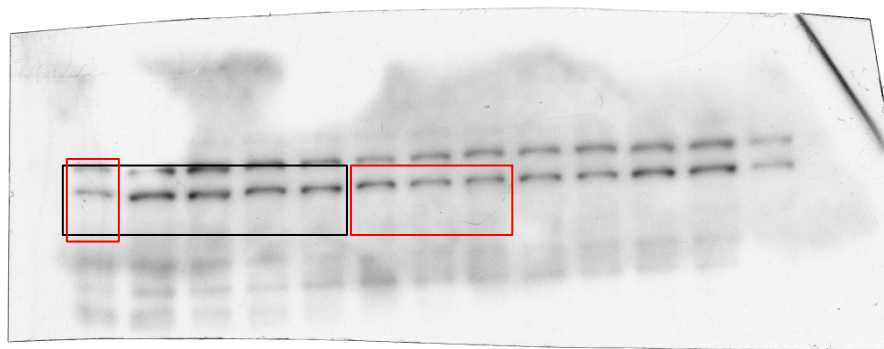

#### **$\beta$ -actin**

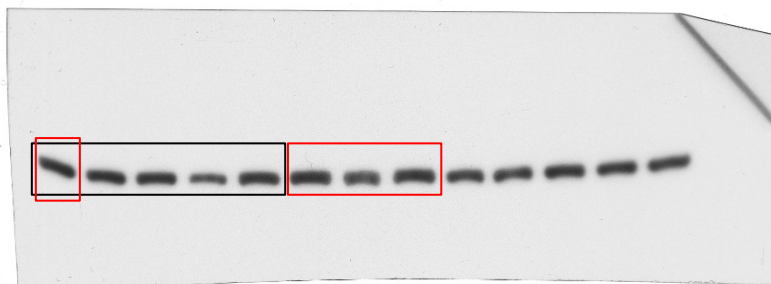

**Sample loading order: 1° CTR – 2° PA 1 mM– 3° D-Allulose 1 mM + PA – 4° D-Allulose 10 mM + PA – 5° D-Allulose 20 mM + PA – 6° D-Allulose 1 mM – 7° D-Allulose 10 mM- 8° D-Allulose 20 mM - other samples**

**Original images for blots of figure 5B and S5B: pEIF-2 $\alpha$  and  $\beta$ -actin.** In the black boxes the parts of the images used in figure 6B. In the red boxes the parts of the images used in figure S6B.

**pEIF-2 $\alpha$**

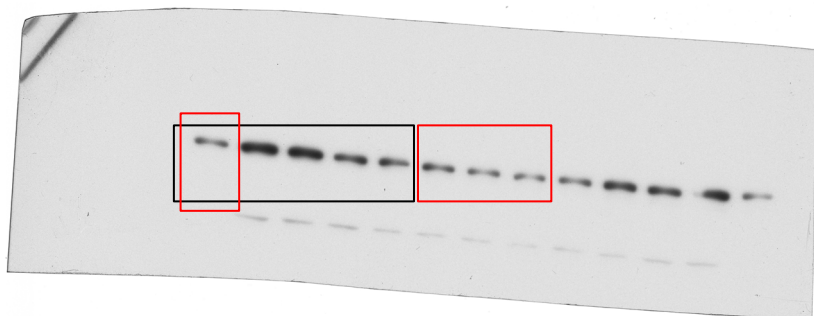

**$\beta$ -actin**

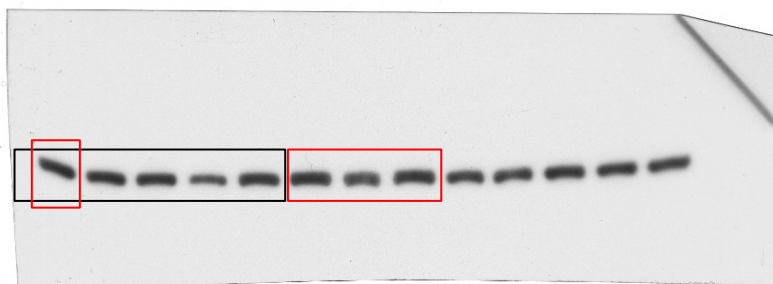

**Sample loading order: 1° CTR – 2° PA 1 mM – 3° D-Allulose 1 mM + PA – 4° D-Allulose 10 mM + PA – 5° D-Allulose 20 mM + PA – 6° D-Allulose 1 mM – 7° D-Allulose 10 mM – 8° D-Allulose 20 mM - other samples**

**Original images for blots of figure 6A: PPAR- $\gamma$  and  $\beta$  actin.** In the black box the parts of the image used in figure 6A.

**PPAR- $\gamma$**

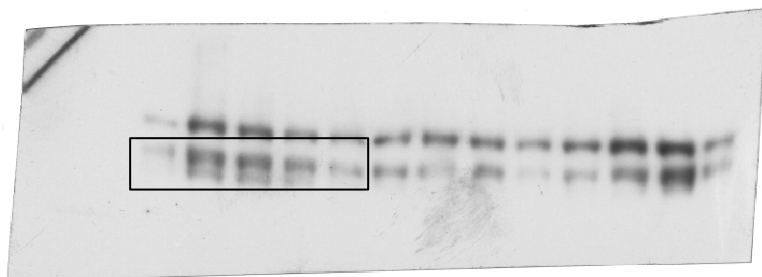

**$\beta$ -actin**

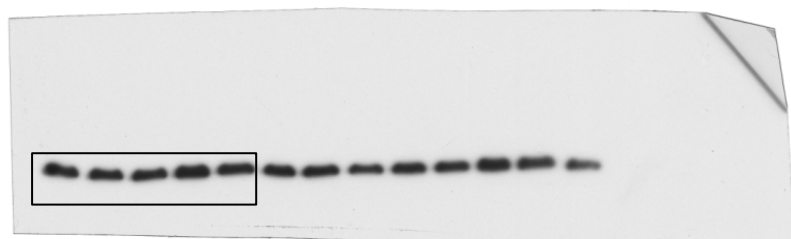

**Sample loading order: 1° CTR – 2° PA 1 mM – 3° PA + D-Allulose 1 mM – 4° PA + D-Allulose 10 mM – 5° PA + D-Allulose 20 mM - other samples**

**Original images for blots of figure 6B: NF- $\kappa$ B and Lamin B.** In the black box the part of the image used in figure 6B.

**NF- $\kappa$ B**

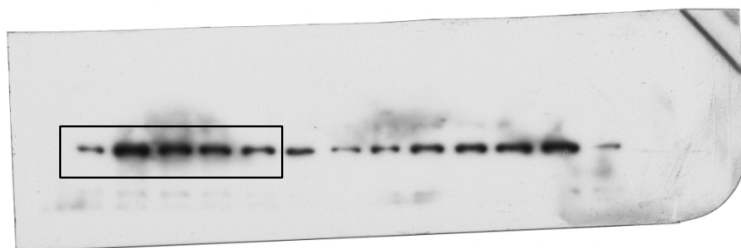

**Lamin B**

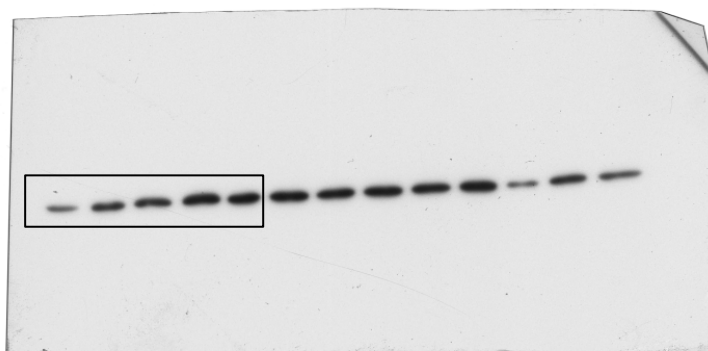

**Sample loading order: 1° CTR – 2° PA 1 mM – 3° PA + D-Allulose 1 mM – 4° PA + D-Allulose 10 mM – 5° PA + D-Allulose 20 mM – other samples**



**Original images for blots of figure 6C: pEIF-2 $\alpha$  and  $\beta$ -actin.** In the black box the part of the image used in figure 6C.

**pEIF-2 $\alpha$**

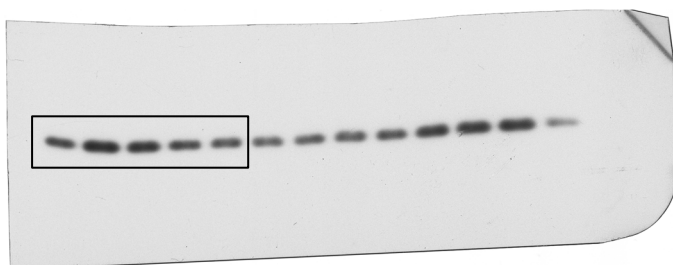

**$\beta$ -actin**

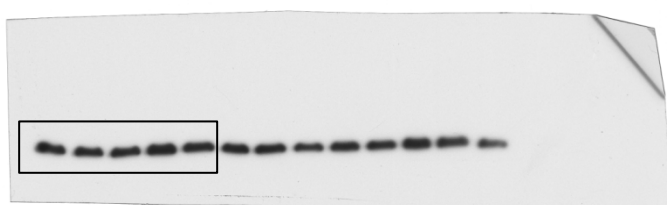

**Sample loading order: 1° CTR – 2° PA 1 mM – 3° PA + D-Allulose 1 mM – 4° PA + D-Allulose 10 mM – 5° PA + D-Allulose 20 mM – other samples**

The correct migration of each protein of interest into the gels was verified by the use of molecular weight markers comparing membranes and films.
